# Supplementary material
Source: publisher figshare collection journal article supplement (https://sage.figshare.com/ndownloader/files/22827131)
Supplement: Supplementary file 1 [file 22827131]

**APPENDIX**

**Table C: Changes in Crime Rates and the Banned Refugee Population – IV Results**

|  | **Using Arrest Data** | | | **Using Offense Data** | | |
| --- | --- | --- | --- | --- | --- | --- |
| **Dependent Variable:** | **All** | **Violent** | **Property** | **All** | **Violent** | **Property** |
| **Crimes** | **Crimes** | **Crimes** | **Crimes** | **Crimes** | **Crimes** |
| **Δ(Refugees/1,000 people)** | -1.387 | -1.035 | -0.351 | -5.939 | -2.002 | -3.937 |
|  | (1.513) | (0.649) | (1.021) | (4.609) | (1.398) | (3.433) |
| Δ(Population) | -0.004* | -0.001 | -0.003* | -0.014** | -0.002 | -0.012** |
|  | (0.003) | (0.001) | (0.002) | (0.006) | (0.001) | (0.005) |
| Δ(Share Male 18-25 Years Old) | 0.064* | 0.028** | 0.036 | -0.018 | 0.022 | -0.040 |
|  | (0.034) | (0.012) | (0.026) | (0.083) | (0.016) | (0.076) |
| Δ(Share Blacks) | 2.834 | -11.254 | 14.070 | 10.310 | -0.910 | 11.220 |
|  | (26.111) | (8.741) | (18.702) | (53.948) | (11.297) | (46.967) |
| Δ(Share Hispanics) | -12.243 | -10.331 | -1.906 | -94.868** | -22.583*** | -72.285** |
|  | (23.834) | (7.807) | (17.236) | (40.286) | (6.868) | (36.009) |
| Δ(Population Density) | 0.002*** | 0.000*** | 0.002*** | 0.000 | 0.001** | -0.001 |
|  | (0.000) | (0.000) | (0.000) | (0.001) | (0.000) | (0.001) |
| Δ(Unemployment Rate) | -0.006 | -0.005 | -0.002 | -0.169** | -0.009 | -0.160*** |
|  | (0.021) | (0.008) | (0.016) | (0.070) | (0.013) | (0.062) |
| Δ(Median HH Income in thousands) | -19.791 | -6.136 | -13.657 | -30.816 | -9.193** | -21.623 |
|  | (16.128) | (4.625) | (12.059) | (25.026) | (4.392) | (22.804) |
| Δ(Poverty Rate) | -0.020 | -0.007 | -0.014 | -0.027 | -0.011** | -0.015 |
|  | (0.023) | (0.007) | (0.017) | (0.035) | (0.006) | (0.033) |
| County Fixed-Effects | Y | Y | Y | Y | Y | Y |
| Year Fixed-Effects | Y | Y | Y | Y | Y | Y |
| Observations | 16,995 | 16,995 | 16,995 | 16,995 | 16,995 | 16,995 |
|  |  |  |  |  |  |  |
| *First-Stage Results* |  |  |  |  |  |  |
| IV | 1.1425*** | | | | | |
|  | (0.3225) | | | | | |
| F-stat | 12.551 | | | | | |
| R-squared | 0.1292 | | | | | |

**Notes:** All results are population weighted. Robust standard errors are clustered at the county level and shown in parentheses. *** p<0.01, ** p<0.05, * p<0.1.
